# Supplementary material for: Altered Oral Viral Ecology in Association with Periodontal Disease
Source: PubMed Central journal article supplement — mBio. 2014 May 20;5(3):e01133-14. doi: 10.1128/mBio.01133-14 (PMC4030452; doi:10.1128/mbio.01133-14), 2014-05-20
Supplement: mbo003141840st1.pdf [file mbo003141840st1.pdf]

**Supplemental Table 1a: Saliva virome reads**

| <b>Sample</b> | <b>Initial Reads</b> | <b>Removed</b> | <b>Mean Length</b> | <b>16S</b> | <b>Human</b> | <b>Final Reads</b> | <b>Contigs</b> | <b>GC Content</b> | <b>Mean Length</b> |
|---------------|----------------------|----------------|--------------------|------------|--------------|--------------------|----------------|-------------------|--------------------|
| D1            | 567,247              | 94,543         | 96                 | 1          | 1            | 472,702            | 444            | 53.2              | 1,037              |
| D2            | 511,356              | 102,271        | 88                 | 0          | 7            | 409,078            | 396            | 56.8              | 638                |
| D3            | 1,317,372            | 217,178        | 145                | 0          | 2,464        | 1,097,730          | 2,045          | 44.4              | 896                |
| D4            | 689,349              | 73,874         | 88                 | 1          | 1            | 615,473            | 931            | 47.4              | 755                |
| D5            | 687,438              | 94,827         | 97                 | 0          | 16           | 592,595            | 134            | 39.5              | 1,460              |
| D6            | 601,163              | 44,538         | 102                | 0          | 5            | 556,620            | 540            | 52.1              | 1,071              |
| D7            | 890,165              | 205,422        | 102                | 0          | 5            | 684,738            | 872            | 53.9              | 1,017              |
| H1            | 699,367              | 26,901         | 90                 | 0          | 2,202        | 670,264            | 201            | 54.1              | 507                |
| H2            | 661,356              | 134,516        | 98                 | 1          | 4            | 526,835            | 273            | 51.5              | 982                |
| H3            | 506,657              | 41,834         | 90                 | 0          | 2            | 464,821            | 376            | 40.0              | 1,036              |
| H4            | 1,015,668            | 188,118        | 184                | 0          | 0            | 827,550            | 42             | 44.7              | 915                |
| H5            | 788,311              | 307,558        | 190                | 0          | 537          | 480,216            | 1,172          | 44.5              | 944                |
| H6            | 1,020,227            | 155,748        | 174                | 0          | 248          | 864,231            | 979            | 44.9              | 1,480              |
| H7            | 932,944              | 339,181        | 194                | 0          | 417          | 593,346            | 1,314          | 42.1              | 904                |
| H8            | 1,268,523            | 207,773        | 142                | 0          | 3,132        | 1,055,618          | 2,176          | 43.7              | 886                |
| H9            | 567,547              | 93,241         | 90                 | 0          | 1            | 474,305            | 317            | 54.8              | 759                |

## Supplemental Table 1b: Subgingival virome reads

| Sample | Initial Reads | Removed | Mean Length | 16S | Human | Final Reads | Contigs | GC Content | Mean Length |
|--------|---------------|---------|-------------|-----|-------|-------------|---------|------------|-------------|
| D1     | 858,742       | 145,675 | 123         | 0   | 3,607 | 709,460     | 1,703   | 45.2       | 1,102       |
| D2     | 798,963       | 145,291 | 180         | 0   | 2,529 | 651,143     | 1,990   | 45.8       | 1,045       |
| D3     | 830,697       | 109,289 | 179         | 0   | 2,495 | 718,913     | 772     | 44.1       | 1,444       |
| D4     | 720,023       | 165,941 | 152         | 0   | 5,507 | 548,575     | 731     | 41.7       | 1,199       |
| D5     | 540,615       | 186,215 | 130         | 0   | 1,522 | 352,878     | 657     | 42.1       | 899         |
| D6     | 766,352       | 53,306  | 117         | 0   | 476   | 712,570     | 2,764   | 44.2       | 957         |
| D7     | 563,725       | 114,164 | 139         | 0   | 2,418 | 447,143     | 791     | 45.2       | 1,156       |
| H1     | 995,802       | 500,026 | 173         | 0   | 1,183 | 494,593     | 728     | 43.0       | 1,383       |
| H2     | 720,307       | 209,890 | 177         | 0   | 1,853 | 508,564     | 828     | 42.6       | 1,318       |
| H3     | 849,924       | 122,972 | 162         | 0   | 1,065 | 725,887     | 781     | 44.7       | 1,123       |
| H4     | 449,729       | 177,971 | 137         | 0   | 50    | 271,708     | 828     | 44.6       | 623         |
| H5     | 506,867       | 126,152 | 138         | 0   | 55    | 380,660     | 1,622   | 42.4       | 702         |
| H6     | 776,639       | 400,524 | 130         | 0   | 18    | 376,097     | 1,057   | 44.4       | 700         |
| H7     | 827,132       | 345,082 | 189         | 0   | 227   | 481,823     | 1,355   | 43.1       | 1,355       |
| H8     | 854,327       | 148,715 | 171         | 0   | 404   | 705,208     | 870     | 43.3       | 1,388       |
| H9     | 696,116       | 120,209 | 154         | 0   | 2,004 | 573,903     | 1,732   | 43.7       | 1,292       |

## Supplemental Table 1c: Supragingival virome reads

| Sample | Initial Reads | Removed | Mean Length | 16S | Human  | Final Reads | Contigs | GC Content | Mean Length |
|--------|---------------|---------|-------------|-----|--------|-------------|---------|------------|-------------|
| D1     | 709,259       | 74,469  | 125         | 0   | 2,752  | 632,038     | 2,205   | 45.2       | 982         |
| D2     | 787,180       | 144,734 | 188         | 0   | 3,068  | 639,378     | 2,547   | 44.8       | 1,162       |
| D3     | 824,331       | 109,882 | 178         | 0   | 2,077  | 712,372     | 1,229   | 43.5       | 1,465       |
| D4     | 689,546       | 127,547 | 158         | 0   | 1,747  | 560,252     | 1,382   | 45.7       | 1,055       |
| D5     | 725,964       | 118,405 | 138         | 0   | 2,272  | 605,287     | 1,531   | 46.7       | 1,224       |
| D6     | 1,067,818     | 312,653 | 120         | 0   | 2,167  | 752,998     | 3,081   | 47.5       | 982         |
| D7     | 1,245,370     | 218,058 | 137         | 0   | 5,649  | 1,021,663   | 1,637   | 44.1       | 1,076       |
| H1     | 782,218       | 326,384 | 175         | 0   | 3,775  | 452,059     | 629     | 42.5       | 1,177       |
| H2     | 758,142       | 145,153 | 175         | 0   | 5,918  | 607,071     | 548     | 43.0       | 1,324       |
| H3     | 875,727       | 166,742 | 173         | 0   | 3,359  | 705,626     | 1,083   | 43.2       | 1,319       |
| H4     | 658,557       | 194,350 | 125         | 0   | 11     | 464,196     | 1,105   | 43.2       | 652         |
| H5     | 920,729       | 401,788 | 140         | 0   | 63     | 518,878     | 1,090   | 45.1       | 682         |
| H6     | 570,486       | 95,331  | 148         | 0   | 36     | 475,119     | 1,394   | 42.0       | 626         |
| H7     | 624,281       | 169,907 | 200         | 0   | 2,230  | 452,144     | 2,703   | 43.7       | 831         |
| H8     | 974,345       | 122,320 | 166         | 0   | 56,834 | 795,191     | 1,131   | 43.2       | 1,238       |
| H9     | 785,126       | 147,400 | 149         | 0   | 1,042  | 636,684     | 766     | 42.3       | 1,178       |
