# Supplementary material for: Altered Oral Viral Ecology in Association with Periodontal Disease
Source: PubMed Central journal article supplement — mBio. 2014 May 20;5(3):e01133-14. doi: 10.1128/mBio.01133-14 (PMC4030452; doi:10.1128/mbio.01133-14), 2014-05-20
Supplement: mbo003141840st2.pdf [file mbo003141840st2.pdf]

**Supplemental Table 2. Sub- and supra-gingival virome homologues within and between subjects**

| By Subject | Subgingival                                   |                                               |                      | Supragingival                                 |                                               |                      |
|------------|-----------------------------------------------|-----------------------------------------------|----------------------|-----------------------------------------------|-----------------------------------------------|----------------------|
|            | Percent Homologous Intra-Subject <sup>a</sup> | Percent Homologous Inter-Subject <sup>a</sup> | P value <sup>b</sup> | Percent Homologous Intra-Subject <sup>a</sup> | Percent Homologous Inter-Subject <sup>a</sup> | P value <sup>b</sup> |
| D1         | 88.87 ± 1.81                                  | 54.13 ± 3.61                                  | <0.0001              | 79.92 ± 1.96                                  | 52.91 ± 2.16                                  | <0.0001              |
| D2         | 85.14 ± 2.28                                  | 50.42 ± 3.46                                  | <0.0001              | 86.31 ± 1.35                                  | 33.87 ± 2.05                                  | <0.0001              |
| D3         | 86.81 ± 1.33                                  | 33.39 ± 2.26                                  | <0.0001              | 80.93 ± 1.47                                  | 38.51 ± 1.89                                  | <0.0001              |
| D4         | 83.64 ± 1.88                                  | 51.98 ± 2.70                                  | <0.0001              | 71.65 ± 1.96                                  | 57.98 ± 1.63                                  | <0.0001              |
| D5         | 79.09 ± 2.10                                  | 51.17 ± 2.37                                  | <0.0001              | 80.78 ± 1.84                                  | 50.19 ± 2.29                                  | <0.0001              |
| D6         | 82.27 ± 2.72                                  | 67.55 ± 4.37                                  | 0.0061               | 78.60 ± 2.24                                  | 64.25 ± 2.62                                  | <0.0001              |
| D7         | 73.28 ± 2.42                                  | 61.59 ± 2.27                                  | 0.0016               | 70.91 ± 1.98                                  | 61.30 ± 1.86                                  | 0.0013               |
| H1         | 80.47 ± 1.98                                  | 55.50 ± 2.41                                  | <0.0001              | 80.59 ± 1.98                                  | 56.44 ± 2.40                                  | <0.0001              |
| H2         | 82.41 ± 1.95                                  | 53.93 ± 2.85                                  | <0.0001              | 76.63 ± 1.43                                  | 41.24 ± 1.55                                  | <0.0001              |
| H3         | 81.74 ± 1.60                                  | 41.46 ± 2.06                                  | <0.0001              | 72.08 ± 1.74                                  | 53.10 ± 1.59                                  | <0.0001              |
| H4         | 85.65 ± 1.52                                  | 46.91 ± 2.62                                  | <0.0001              | 87.25 ± 1.50                                  | 45.83 ± 2.82                                  | <0.0001              |
| H5         | 87.98 ± 1.45                                  | 42.88 ± 2.82                                  | <0.0001              | 87.13 ± 1.44                                  | 41.49 ± 2.74                                  | <0.0001              |
| H6         | 86.41 ± 1.55                                  | 46.43 ± 2.70                                  | <0.0001              | 86.64 ± 1.53                                  | 47.08 ± 2.73                                  | <0.0001              |
| H7         | 89.76 ± 1.36                                  | 45.04 ± 3.00                                  | <0.0001              | 88.79 ± 1.47                                  | 47.10 ± 2.96                                  | <0.0001              |
| H8         | 83.37 ± 1.81                                  | 54.90 ± 2.45                                  | <0.0001              | 71.43 ± 2.13                                  | 65.97 ± 2.34                                  | 0.0848               |
| H9         | 71.77 ± 2.21                                  | 59.97 ± 2.07                                  | 0.0008               | 58.03 ± 1.51                                  | 62.59 ± 1.03                                  | 0.9720               |

<sup>a</sup>Based on the mean of 10,000 iterations. 1,000 random contigs were sampled per iteration

<sup>b</sup>Empirical p-value based on the fraction of times the number of reads recruited to contigs for each subject exceeds that for different subjects
