# Supplementary material for: Altered Oral Viral Ecology in Association with Periodontal Disease
Source: PubMed Central journal article supplement — mBio. 2014 May 20;5(3):e01133-14. doi: 10.1128/mBio.01133-14 (PMC4030452; doi:10.1128/mbio.01133-14), 2014-05-20
Supplement: mbo003141840st3.pdf [file mbo003141840st3.pdf]

### Supplemental Table 3. Saliva virome homologues within and between subjects

| By Subject | Percent Homologous Intra-subject <sup>a</sup> | Percent Homologous Inter-subject <sup>a</sup> | P value <sup>b</sup> |
|------------|-----------------------------------------------|-----------------------------------------------|----------------------|
| D1         | 93.94 ± 3.47                                  | 83.09 ± 5.22                                  | <b>0.0333</b>        |
| D2         | 92.98 ± 3.89                                  | 93.34 ± 2.93                                  | 0.4577               |
| D3         | 97.17 ± 1.56                                  | 76.60 ± 7.86                                  | <b>&lt;0.0001</b>    |
| D4         | 95.68 ± 3.33                                  | 90.04 ± 5.80                                  | 0.0866               |
| D5         | 93.88 ± 4.14                                  | 96.73 ± 2.03                                  | 0.7996               |
| D6         | 91.95 ± 5.50                                  | 87.90 ± 3.32                                  | 0.1664               |
| D7         | 93.84 ± 2.65                                  | 84.10 ± 4.22                                  | <b>0.0126</b>        |
| H1         | 94.76 ± 3.39                                  | 83.28 ± 6.58                                  | <b>0.0010</b>        |
| H2         | 93.59 ± 2.49                                  | 75.55 ± 5.42                                  | <b>0.0002</b>        |
| H3         | 93.80 ± 3.39                                  | 83.71 ± 5.82                                  | <b>0.0368</b>        |
| H4         | 96.96 ± 0.81                                  | 81.08 ± 3.85                                  | <b>&lt;0.0001</b>    |
| H5         | 95.90 ± 1.58                                  | 78.79 ± 5.10                                  | <b>0.0001</b>        |
| H6         | 96.38 ± 1.18                                  | 68.26 ± 7.08                                  | <b>&lt;0.0001</b>    |
| H7         | 96.35 ± 1.74                                  | 78.42 ± 6.24                                  | <b>0.0005</b>        |
| H8         | 96.39 ± 1.56                                  | 72.55 ± 6.89                                  | <b>&lt;0.0001</b>    |
| H9         | 88.71 ± 3.27                                  | 82.72 ± 3.48                                  | <b>0.0485</b>        |

<sup>a</sup>Based on the mean of 10,000 iterations. 1,000 random contigs were sampled per iteration

<sup>b</sup>Empirical p-value based on the fraction of times the estimated percent homologous contigs for each subject exceeds that for different subjects
