# Supplementary material for: Altered Oral Viral Ecology in Association with Periodontal Disease
Source: PubMed Central journal article supplement — mBio. 2014 May 20;5(3):e01133-14. doi: 10.1128/mBio.01133-14 (PMC4030452; doi:10.1128/mbio.01133-14), 2014-05-20
Supplement: mbo003141840st4.pdf [file mbo003141840st4.pdf]

**Supplemental Table 4. Saliva virome homologues within and between subjects**

| By Subject | Percent Homologous Intra-subject <sup>a</sup> | Percent Homologous Inter-subject <sup>a</sup> | P value <sup>b</sup> |
|------------|-----------------------------------------------|-----------------------------------------------|----------------------|
| D1         | 89.37 ± 1.77                                  | 53.90 ± 3.68                                  | <0.0001              |
| D2         | 83.35 ± 2.37                                  | 53.54 ± 3.05                                  | <0.0001              |
| D3         | 87.44 ± 1.27                                  | 32.99 ± 2.22                                  | <0.0001              |
| D4         | 86.48 ± 1.85                                  | 51.97 ± 3.05                                  | <0.0001              |
| D5         | 77.86 ± 2.02                                  | 51.18 ± 2.20                                  | <0.0001              |
| D6         | 81.97 ± 2.75                                  | 68.44 ± 4.28                                  | 0.0127               |
| D7         | 76.41 ± 2.44                                  | 60.78 ± 2.48                                  | <0.0001              |
| H1         | 80.15 ± 1.91                                  | 54.39 ± 2.29                                  | <0.0001              |
| H2         | 81.99 ± 1.89                                  | 53.36 ± 2.72                                  | <0.0001              |
| H3         | 82.46 ± 1.70                                  | 41.39 ± 2.22                                  | <0.0001              |
| H4         | 82.84 ± 1.76                                  | 51.92 ± 2.68                                  | <0.0001              |
| H5         | 86.83 ± 1.48                                  | 45.50 ± 2.74                                  | <0.0001              |
| H6         | 86.76 ± 1.48                                  | 44.71 ± 2.69                                  | <0.0001              |
| H7         | 88.55 ± 1.42                                  | 46.36 ± 3.05                                  | <0.0001              |
| H8         | 88.20 ± 1.61                                  | 47.85 ± 2.88                                  | <0.0001              |
| H9         | 73.00 ± 2.27                                  | 59.82 ± 2.14                                  | 0.0003               |

<sup>a</sup>Based on the mean of 10,000 iterations. 1,000 random contigs were sampled per iteration

<sup>b</sup>Empirical p-value based on the fraction of times the number of reads recruited to each contig for each subject exceeds that for different subjects
