# Supplementary material for: Altered Oral Viral Ecology in Association with Periodontal Disease
Source: PubMed Central journal article supplement — mBio. 2014 May 20;5(3):e01133-14. doi: 10.1128/mBio.01133-14 (PMC4030452; doi:10.1128/mbio.01133-14), 2014-05-20
Supplement: mbo003141840st5.pdf [file mbo003141840st5.pdf]

**Supplemental Table 5. Viral homologues within and between subject groups**

| <b>Virome</b>           |                                                    |                                                      |                            |
|-------------------------|----------------------------------------------------|------------------------------------------------------|----------------------------|
| <b>By Site</b>          | <b>Percent Homologous within Group<sup>a</sup></b> | <b>Percent Homologous between Groups<sup>a</sup></b> | <b>p-value<sup>b</sup></b> |
| Saliva                  | 3.75 ± 5.76                                        | 2.08 ± 3.34                                          | 0.2701                     |
| Subgingival             | 15.09 ± 17.27                                      | 6.68 ± 14.03                                         | 0.1500                     |
| Supragingival           | 12.28 ± 13.71                                      | 5.79 ± 12.20                                         | 0.1532                     |
| <b>By Health Status</b> |                                                    |                                                      |                            |
| <b>Saliva</b>           |                                                    |                                                      |                            |
| Health                  | 16.79 ± 7.71                                       | 15.93 ± 16.59                                        | 0.2112                     |
| Disease                 | 23.92 ± 16.25                                      | 13.40 ± 14.46                                        | 0.2384                     |
| <b>Subgingival</b>      |                                                    |                                                      |                            |
| Health                  | 16.93 ± 7.88                                       | 16.36 ± 17.45                                        | 0.1989                     |
| Disease                 | 24.35 ± 17.18                                      | 13.94 ± 14.95                                        | 0.2557                     |
| <b>Supragingival</b>    |                                                    |                                                      |                            |
| Health                  | 20.87 ± 11.91                                      | 23.49 ± 19.80                                        | 0.3436                     |
| Disease                 | 35.12 ± 7.48                                       | 18.57 ± 14.97                                        | 0.2176                     |

<sup>a</sup>Based on the mean of 10,000 iterations. 1,000 random contigs were sampled per iteration

<sup>b</sup>Empirical p-value based on the fraction of times the estimated percent homologous contigs for each group exceeded that between groups
