# Supplementary material for: Altered Oral Viral Ecology in Association with Periodontal Disease
Source: PubMed Central journal article supplement — mBio. 2014 May 20;5(3):e01133-14. doi: 10.1128/mBio.01133-14 (PMC4030452; doi:10.1128/mbio.01133-14), 2014-05-20
Supplement: mbo003141840st6.pdf [file mbo003141840st6.pdf]

**Supplemental Table 6. Saliva Shared 16S OTUs within and between subjects**

| By Subject | Percent Shared OTUs Intra-subject <sup>a</sup> | Percent Shared OTUs Inter-subject <sup>a</sup> | P value <sup>b</sup> |
|------------|------------------------------------------------|------------------------------------------------|----------------------|
| D1         | 78.41 ± 16.59                                  | 85.46 ± 11.62                                  | 0.6408               |
| D2         | 77.13 ± 10.71                                  | 56.37 ± 14.15                                  | 0.1348               |
| D3         | 71.95 ± 11.03                                  | 65.98 ± 13.22                                  | 0.3767               |
| D4         | 58.83 ± 13.92                                  | 80.27 ± 9.63                                   | 0.8809               |
| D5         | 65.54 ± 11.26                                  | 70.06 ± 11.40                                  | 0.6188               |
| D6         | 72.68 ± 11.03                                  | 67.03 ± 11.44                                  | 0.3508               |
| D7         | 76.97 ± 10.99                                  | 62.60 ± 12.84                                  | 0.1971               |
| H1         | 85.18 ± 9.87                                   | 56.86 ± 20.28                                  | 0.1226               |
| H2         | 68.63 ± 11.21                                  | 69.11 ± 11.56                                  | 0.5184               |
| H3         | 26.16 ± 14.73                                  | 96.57 ± 2.01                                   | 0.9999               |
| H4         | 90.78 ± 10.67                                  | 84.44 ± 14.80                                  | 0.3016               |
| H5         | 89.17 ± 15.79                                  | 91.33 ± 5.10                                   | 0.4469               |
| H6         | 87.53 ± 14.00                                  | 87.82 ± 14.74                                  | 0.5207               |
| H7         | 89.08 ± 12.07                                  | 87.75 ± 15.35                                  | 0.4854               |
| H8         | 43.15 ± 13.86                                  | 88.77 ± 5.41                                   | 0.9973               |
| H9         | 62.68 ± 12.96                                  | 74.46 ± 9.25                                   | 0.7373               |

<sup>a</sup>Based on the mean of 10,000 iterations. 1,000 random OTUs were sampled per iteration

<sup>b</sup>Empirical p-value based on the fraction of times the estimated percent shared OTUs for each subject exceeded that for different subjects
