# Supplementary material for: Altered Oral Viral Ecology in Association with Periodontal Disease
Source: PubMed Central journal article supplement — mBio. 2014 May 20;5(3):e01133-14. doi: 10.1128/mBio.01133-14 (PMC4030452; doi:10.1128/mbio.01133-14), 2014-05-20
Supplement: mbo003141840st7.pdf [file mbo003141840st7.pdf]

**Supplemental Table 7. Subgingival and supragingival shared 16S OTUs**

| By Subject | Subgingival                                           |                                                       |                      | Supragingival                                         |                                                       |                      |
|------------|-------------------------------------------------------|-------------------------------------------------------|----------------------|-------------------------------------------------------|-------------------------------------------------------|----------------------|
|            | Percent Shared<br>OTUs Intra-<br>subject <sup>a</sup> | Percent Shared<br>OTUs Inter-<br>subject <sup>a</sup> | P value <sup>b</sup> | Percent Shared<br>OTUs Intra-<br>subject <sup>a</sup> | Percent Shared<br>OTUs Inter-<br>subject <sup>a</sup> | P value <sup>b</sup> |
| D1         | 56.79 ± 20.45                                         | 72.63 ± 14.59                                         | 0.6849               | 71.68 ± 18.96                                         | 66.60 ± 18.01                                         | 0.4212               |
| D2         | 47.16 ± 18.29                                         | 67.36 ± 16.66                                         | 0.7315               | 60.19 ± 17.08                                         | 57.67 ± 14.81                                         | 0.4548               |
| D3         | 35.04 ± 24.41                                         | 92.48 ± 7.55                                          | 0.9719               | 36.53 ± 23.92                                         | 90.03 ± 9.67                                          | 0.9497               |
| D4         | 66.33 ± 17.85                                         | 57.53 ± 18.90                                         | 0.3679               | 52.88 ± 19.51                                         | 69.64 ± 13.90                                         | 0.6858               |
| D5         | 31.22 ± 20.13                                         | 81.94 ± 16.05                                         | 0.8977               | 38.05 ± 22.16                                         | 81.47 ± 17.91                                         | 0.8556               |
| D6         | 46.11 ± 18.01                                         | 68.04 ± 14.60                                         | 0.7465               | 49.50 ± 17.86                                         | 64.71 ± 15.17                                         | 0.6820               |
| D7         | 80.80 ± 12.84                                         | 31.91 ± 15.34                                         | 0.0580               | 74.31 ± 14.33                                         | 42.65 ± 16.03                                         | 0.1231               |
| H1         | 67.09 ± 17.34                                         | 51.16 ± 18.32                                         | 0.2922               | 60.50 ± 18.76                                         | 59.35 ± 19.44                                         | 0.4806               |
| H2         | 78.68 ± 14.66                                         | 35.51 ± 20.19                                         | 0.1103               | 81.91 ± 13.34                                         | 34.00 ± 20.21                                         | 0.0755               |
| H3         | 71.87 ± 16.01                                         | 46.37 ± 18.96                                         | 0.2163               | 78.15 ± 13.61                                         | 38.89 ± 16.49                                         | 0.0831               |
| H4         | 27.41 ± 14.65                                         | 87.43 ± 6.57                                          | 0.9954               | 33.63 ± 17.59                                         | 87.04 ± 8.25                                          | 0.9772               |
| H5         | 34.73 ± 16.18                                         | 82.64 ± 9.35                                          | 0.9643               | 39.61 ± 18.26                                         | 80.72 ± 11.34                                         | 0.9202               |
| H6         | 72.19 ± 15.19                                         | 44.89 ± 17.18                                         | 0.1808               | 58.64 ± 18.63                                         | 61.46 ± 17.91                                         | 0.5375               |
| H7         | 69.61 ± 21.04                                         | 85.83 ± 10.22                                         | 0.7091               | NA <sup>c</sup>                                       | NA <sup>c</sup>                                       | NA <sup>c</sup>      |
| H8         | 46.92 ± 16.91                                         | 67.04 ± 14.38                                         | 0.7462               | 34.21 ± 16.92                                         | 78.47 ± 14.83                                         | 0.9059               |
| H9         | 42.98 ± 18.52                                         | 71.80 ± 15.39                                         | 0.8109               | 65.12 ± 18.35                                         | 51.93 ± 20.21                                         | 0.3289               |

<sup>a</sup>Based on the mean of 10,000 iterations. 1,000 random OTUs were sampled per iteration

<sup>b</sup>Empirical p-value based on the fraction of times the estimated percent shared OTUs for each subject exceeds that for different subjects

<sup>c</sup>Not available
